# Supplementary material for: Oral ruxolitinib induces hair regrowth in patients with moderate-to-severe alopecia areata
Source: JCI journal article supplement (doi:10.1172/jci.insight.89790), 2016-09-21
Supplement: sd2 [file 2]

You are being redirected.
